# Supplementary material
Source: publisher site journal article supplement (https://www.dovepress.com/article/397031)
Supplement: Supplementary file 1 [file get_supplementary_file.php]

***Supplementary Figures***

*
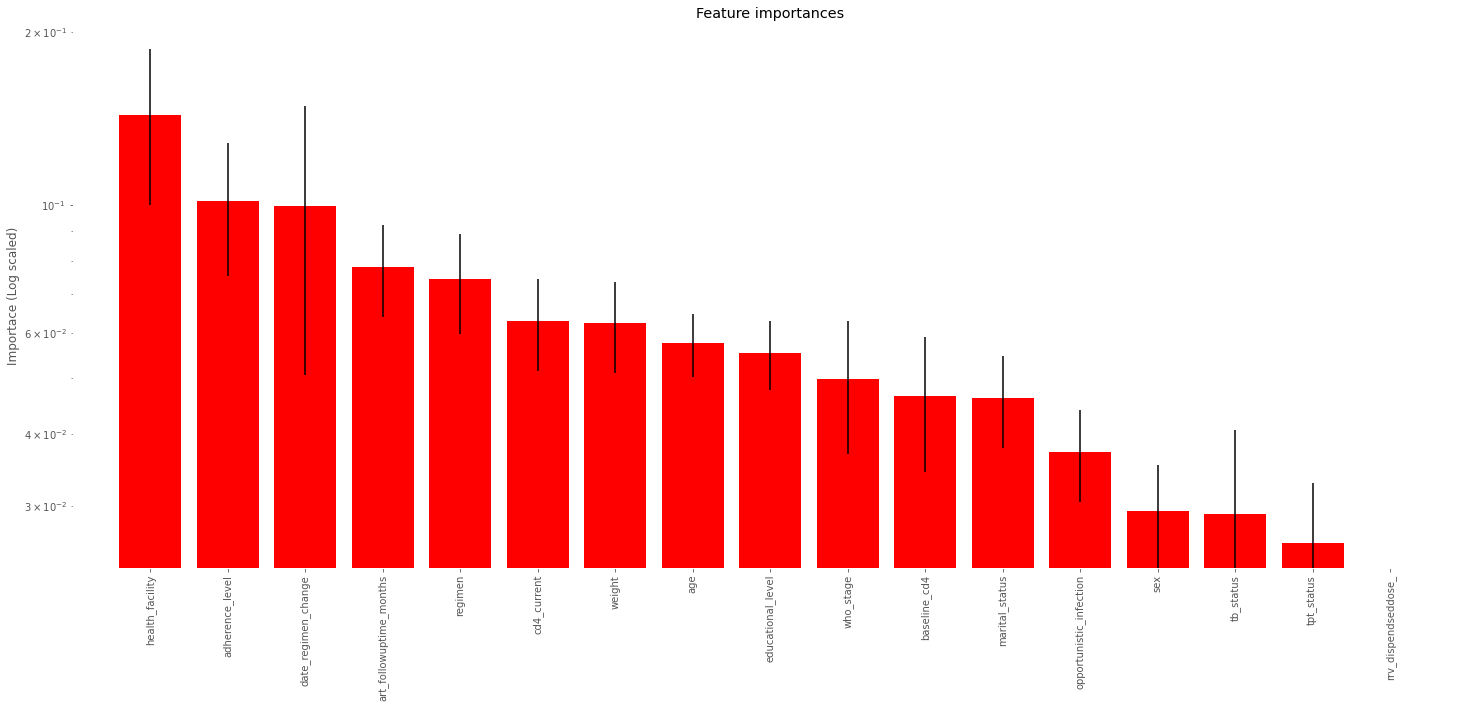
*

Figure 1: relative importance of the selected features in the prediction of unsuppressed viral load (ranked from most to least important).


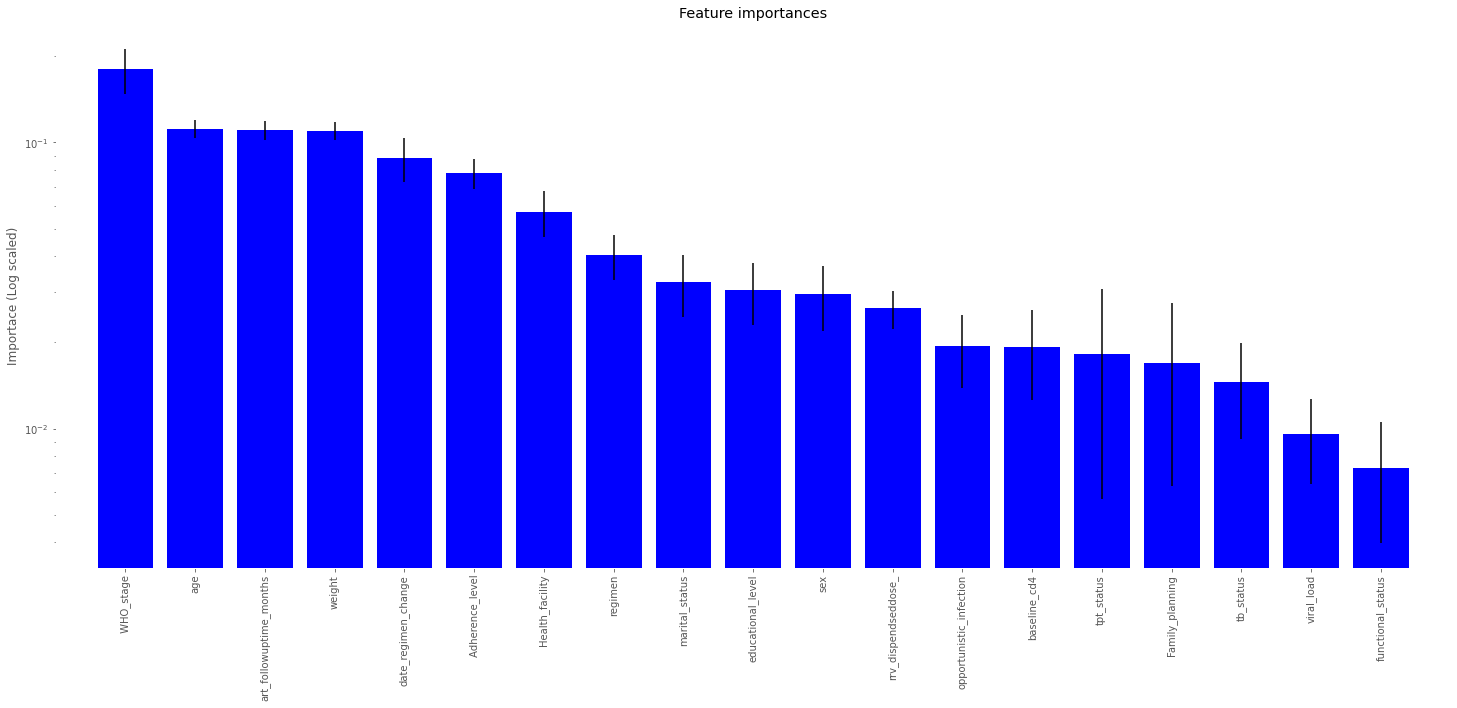


Figure 2: relative importance of the selected features in the prediction of low CD4 (ranked from most to least important).


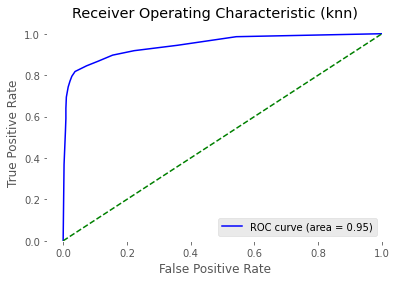


Figure 3: Receiver operating characteristic curves of K-nearest neighbor (KNN) model for viral load prediction

*
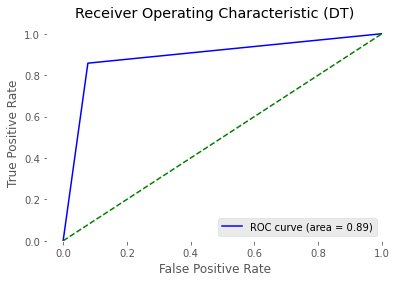
*

Figure 4: Receiver operating characteristic curves of Decision Trees (DT) model for viral load prediction

*
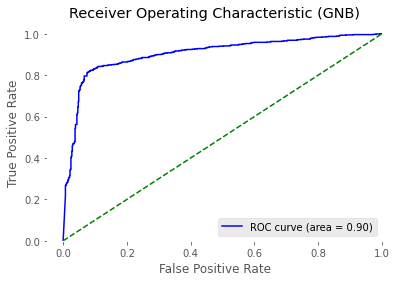
*

Figure 5: Receiver operating characteristic curves of Gaussian Nave Bayes (GNB) model for viral load prediction

*
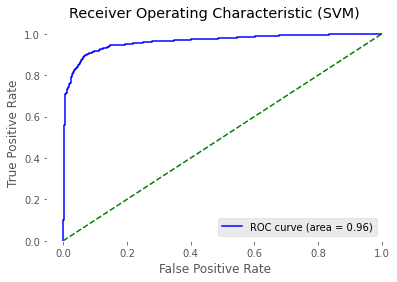
*

Figure 6: Receiver operating characteristic curves of Support Vector Classifier (SVC) model for viral load prediction

*
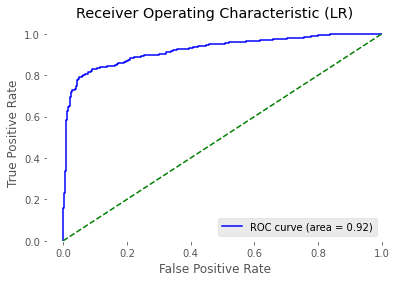
*

Figure 7: Receiver operating characteristic curves of Logistic Regression (LR) model for viral load prediction

*
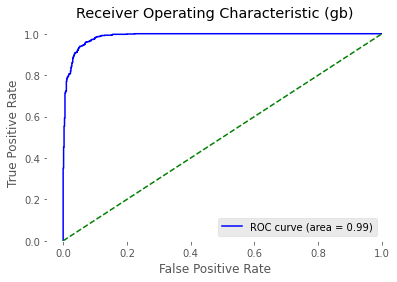
*

Figure 8: Receiver operating characteristic curves of Gradient Boosting (GB) model for viral load prediction


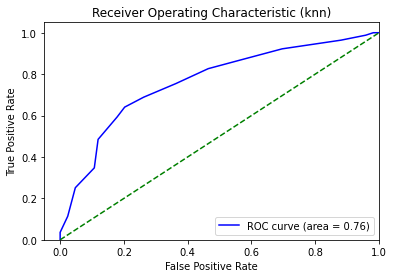


Figure 1: Receiver operating characteristic curves of K-nearest neighbor (KNN) model for CD4 prediction

*
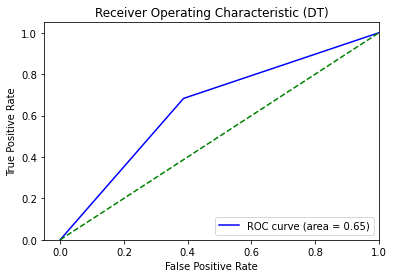
*

Figure 9: Receiver operating characteristic curves of Decision Trees (DT) model for CD4 prediction

*
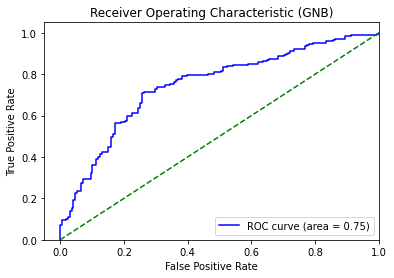
*

Figure 10: Receiver operating characteristic curves of Gaussian Nave Bayes (GNB) model for CD4 prediction

*
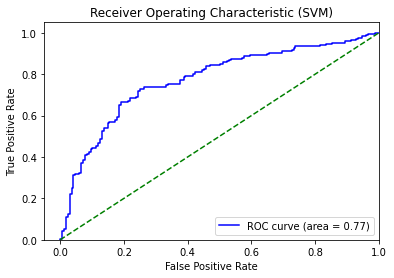
*

Figure 11: Receiver operating characteristic curves of Support Vector Classifier (SVC) model for CD4 prediction

*
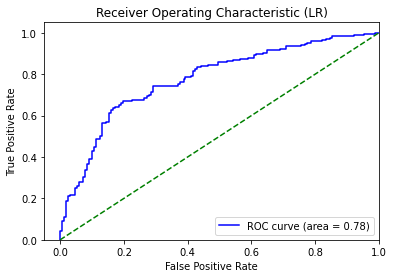
*

Figure 12: Receiver operating characteristic curves of Logistic Regression (LR) model for CD4 prediction

*
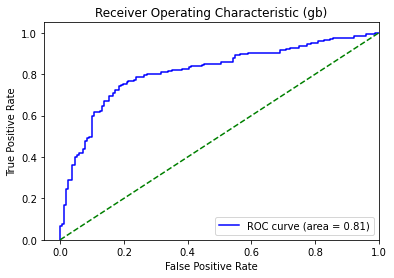
*

Figure 13: Receiver operating characteristic curves of Gradient Boosting (GB) model for CD4 prediction

*
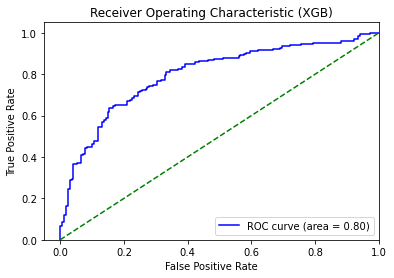
*

Figure 14: Receiver operating characteristic curves of eXtreme Gradient Boosting (XGBoost) model for CD4 prediction


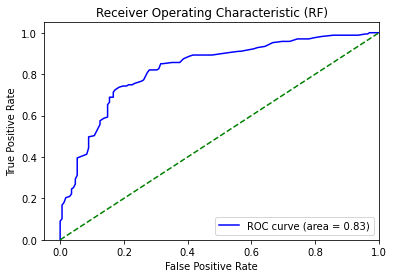


Figure 15: Receiver operating characteristic curves of Random Forest (RF) model for CD4 prediction

| **Table 1 extracted ART databases features(attributes) in the study** | | | | |
| --- | --- | --- | --- | --- |
|  | **Attributes** | **Meaning** | **Value** | **Data type** |
| **Target features for predictive modeling** | Viral load status | The viral load status of the patient currently on the ART | Suppressed  Unsuppressed | Ordinal |
| CD4 | The CD4 count of the patient currently on the ART | <200  >200 | Ordinal |
| **Predictors/features** |  |  |  |  |
|  | **Patient identification** |  |  |  |
| Patient MRN |  |  | Numeric |
| Art Number |  |  | Numeric |
| Health facility |  | Dilla university Referrral hospital  Yirgachefe primary hospital |  |
|  | **Sociodemographic factors** |  |  |  |
|  | Sex | Sex of the patient | Female  Male | Nominal |
| Age | Age of the patient | Numeric age values | Numeric |
| Weight | The weight of the patient on ART | Numeric body weight values | Numeric |
| Marital status | The marital status of the patient | 1-Never married  2-Married  3-Separated  4-Divorsed  5-Widow/Widower | Nominal |
| Educational Level | Educational level of the patient | Unable to read and write  1-No education  2-Primary  3-Secondary  4-Teritiary | Ordinal |
|  | **Clinical factors and behavioural features** |  |  |  |
| Regimen | The current regimen the patient is taking on ART | 1a(30)=d4T(30)-3TC-NVP  1a(40)=d4T(40)-3TC-NVP  1b(30)=d4T(30)-3TC-EFV  1b(40)=d4T(40)-3TC-EFV  1c=AZT-3TC-NVP  1d=AZT-3TC-EFV  2a, 2b, 2c, 2d. 4a, 4b, 4c and 4d. 5a, 5b, 5c, 5d  Other | Nominal |
| Regimen change | Is the regimen changed after starting ART | Yes  No | Nominal |
| Functional status | Functional level of the patient | W-working  A-Ambulatory  B-Bedridden | Nominal |
| Data HIV confirmed | The date of the patient diagnosed with HIV |  | Date |
| ART Start Date | The date ART starts | From 2012-2022 | Date |
| ARV dispensed dose | Dose the patient took for Treatment |  | Numeric |
|  | Adherence level | The adherence level of a patient on ART | Good  Fair  Poor | Ordinal |
| TB screening status | TB diagnosis the patient is on ART | Positive  Negative | Nominal |
| Nutritional screening status |  | Overweight  Undernourished  Normal | Nominal |
| Sex for nutrition |  |  | Nominal |
| TPT started date | The date TPT starts |  | Date |
| TPT completed date | The date TPT completed | Completed  Not completed | Date |
| TPT type | Type of TPT provided |  | Nominal |
| CCS_Offered |  | Yes  No | Nominal |
|  | CCS_Accepted |  | Yes  No | Nominal |
| CCS_ScreenDone |  | Yes  No | Nominal |
| CCS_ScreenDone_Date |  |  | Date |
| CCS_Screen_Method |  | HPV DNA test  VIA |  |
| CCS_HPV_Result |  | HPV Negative  HPV Positive |  |
| Family Planning | This attribute asks the usage of Family planning methods | Yes/No | Yes/No |
| Pregnant | Asks the patient pregnant or not on ART | Yes/No | Yes/No |
| WHO stage | WHO stages at which the patient is on ART | 1-stage 1  2-sage 2  3-stage 3  4-stage 4 | Nominal |
|  | Opportunistic infection |  | Yes/No | Nominal |
| Past ARV Treatment | Dose the patient took Past ARV Treatment | Yes for treatment  No for not treatment | Yes/no |
| Baseline CD4 | The CD4 count of the patient at the start of ART | <100  >100 | Nominal |
| Viral load count | The viral load count of the patient currently on the ART |  | Numeric |
